# Supplementary material
Source: Royal Society of Chemistry journal article supplement (doi:10.1039/d5tc04434k)
Supplement: d5tc04434k1.pdf [file d5tc04434k1.pdf]

## Supporting Information

### **All sites systematic non-stoichiometry regulation of ordering related structure and microstructure for enabling ultralow dielectric loss and temperature stability in Ba(Mg<sub>1/3</sub>Nb<sub>2/3</sub>)O<sub>3</sub> perovskite ceramics**

Yangyang Liu <sup>a</sup>, Maosen Fu <sup>\*a</sup>, Xiao Ma <sup>a</sup>, Lin Zhang <sup>a</sup>, Hanju Guo <sup>a</sup>, Jiayin Li <sup>a</sup>,  
Lei Ni <sup>b</sup>

<sup>a</sup> *State Key Laboratory of Solidification Processing, School of Materials Science and Engineering, Northwestern Polytechnical University, Xi'an 710072, China*

<sup>b</sup> *School of Materials Science and Engineering, Chang'an University, Xi'an 710064, China*

---

\* Corresponding author: [msfu@nwpu.edu.cn](mailto:msfu@nwpu.edu.cn)

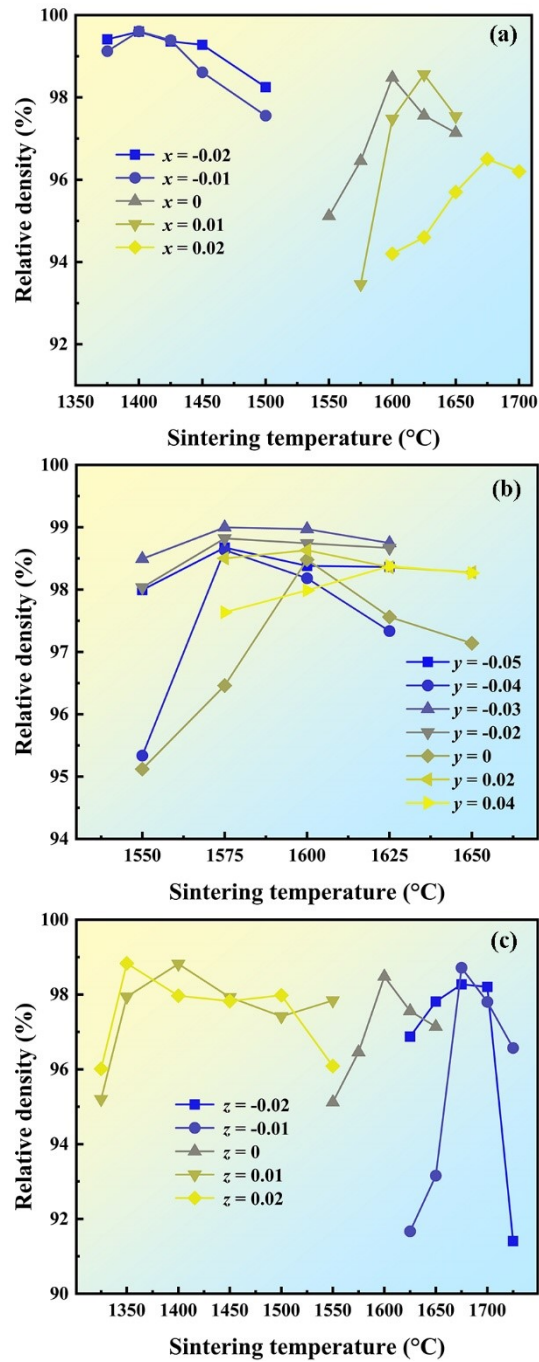

**Fig. S1** The relative density of the non-stoichiometric Ba(Mg<sub>1/3</sub>Nb<sub>2/3</sub>)O<sub>3</sub> ceramics as a function of sintering temperature: (a) Ba<sub>1+x</sub>(Mg<sub>1/3</sub>Nb<sub>2/3</sub>)O<sub>3+x</sub> ceramics, (b) Ba(Mg<sub>1/3+y</sub>Nb<sub>2/3</sub>)O<sub>3+y</sub> ceramics, (c) Ba(Mg<sub>1/3</sub>Nb<sub>2/3+z</sub>)O<sub>3+5z/2</sub> ceramics.

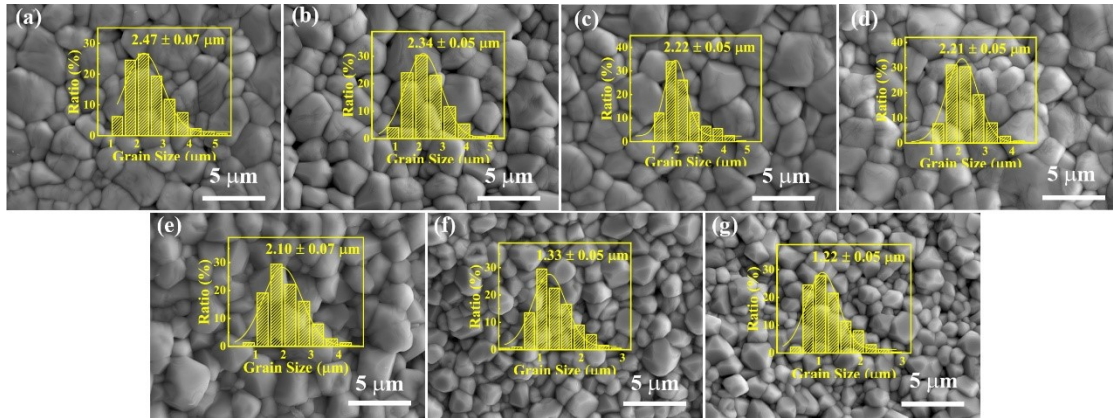

**Fig. S2** SEM images of surface and corresponding grain size distributions for  $\text{Ba}(\text{Mg}_{1/3+y}\text{Nb}_{2/3})\text{O}_{3+y}$  ceramics: (a) -0.05, (b) -0.04, (c) -0.03, (d) -0.02, (e) 0, (f) 0.02, (g), 0.04.

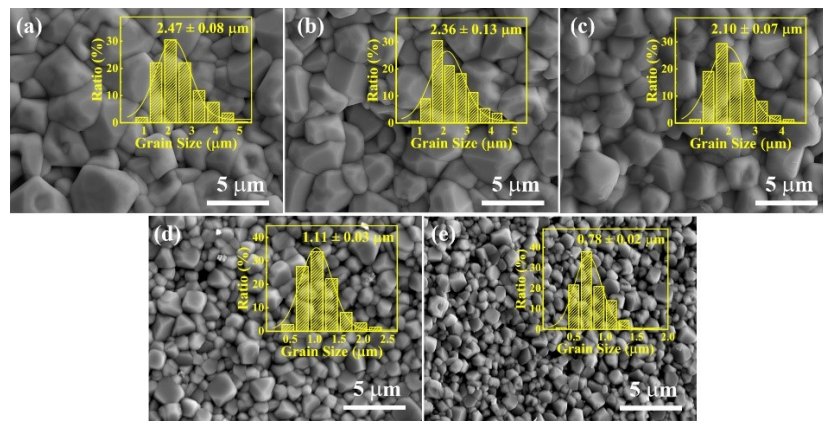

**Fig. S3** SEM images of surface and corresponding grain size distributions for  $\text{Ba}(\text{Mg}_{1/3}\text{Nb}_{2/3+z})\text{O}_{3+5z/2}$  ceramics: (a) -0.02, (b) -0.01, (c) 0, (d) 0.01, (e) 0.02.

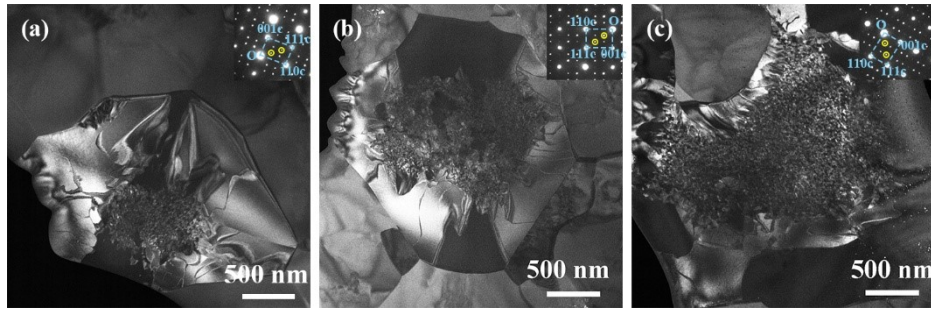

**Fig. S4** Dark-field images and SAED patterns of  $\text{Ba}(\text{Mg}_{1/3+y}\text{Nb}_{2/3})\text{O}_{3+y}$  ceramics: (a)  $y = -0.02$ , (b)  $y = 0$ , (c)  $y = 0.02$

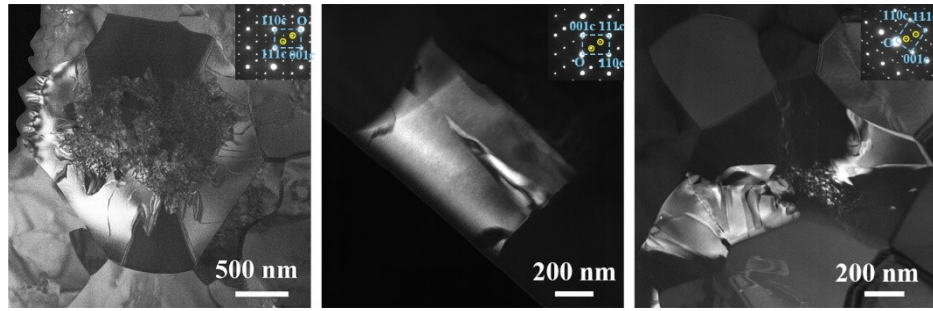

**Fig. S5** Dark-field images and SAED patterns of  $\text{Ba}(\text{Mg}_{1/3}\text{Nb}_{2/3+z})\text{O}_{3+5z/2}$  ceramics: (a)  $z = 0$ , (b)  $z = 0.01$ , (c)  $z = 0.02$ .
